# Supplementary material for: Integrated epigenomic analysis stratifies chromatin remodellers into distinct functional groups
Source: PubMed Central journal article supplement (PMC6371444; doi:10.1186/s13072-019-0258-9), 2019-02-12

SUPPLEMENTARY FIGURE 1

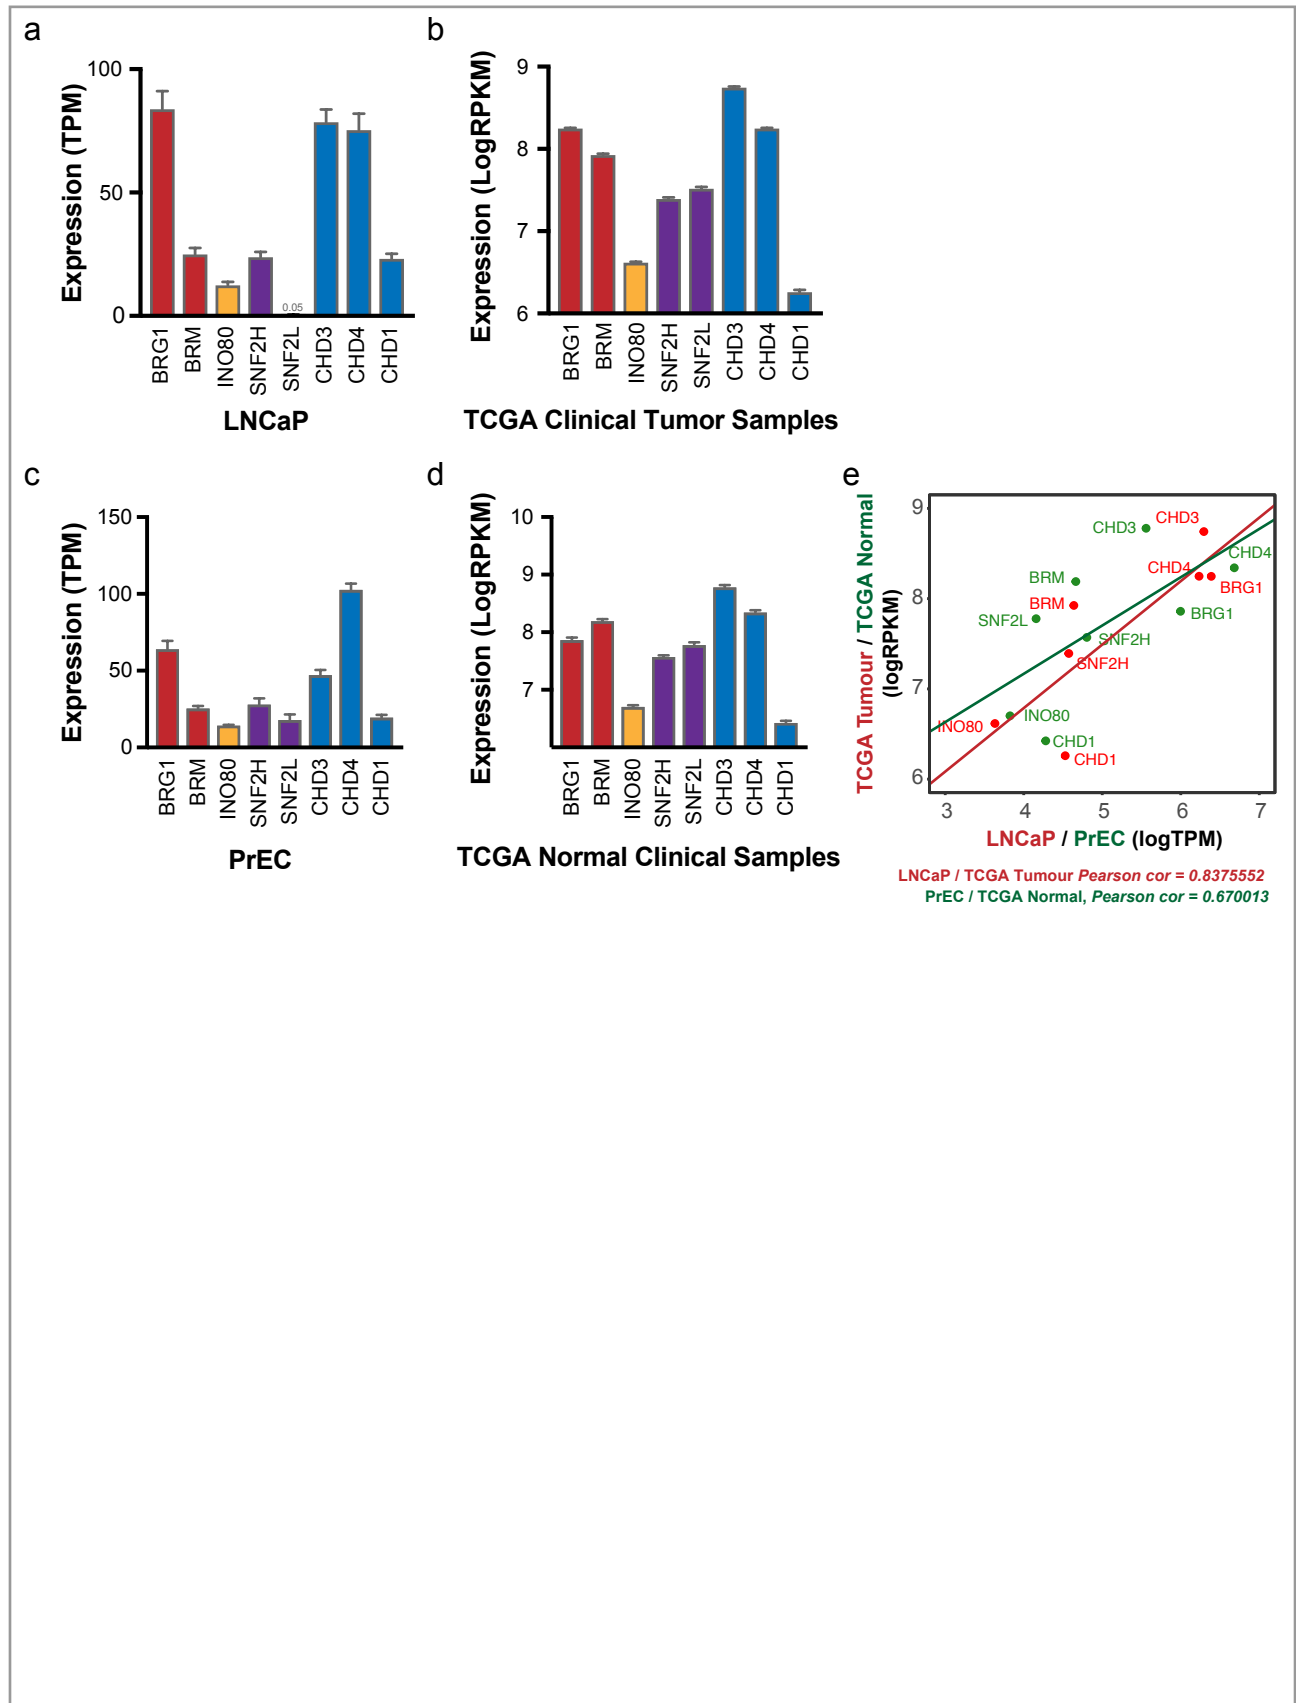

# SUPPLEMENTARY FIGURE 2

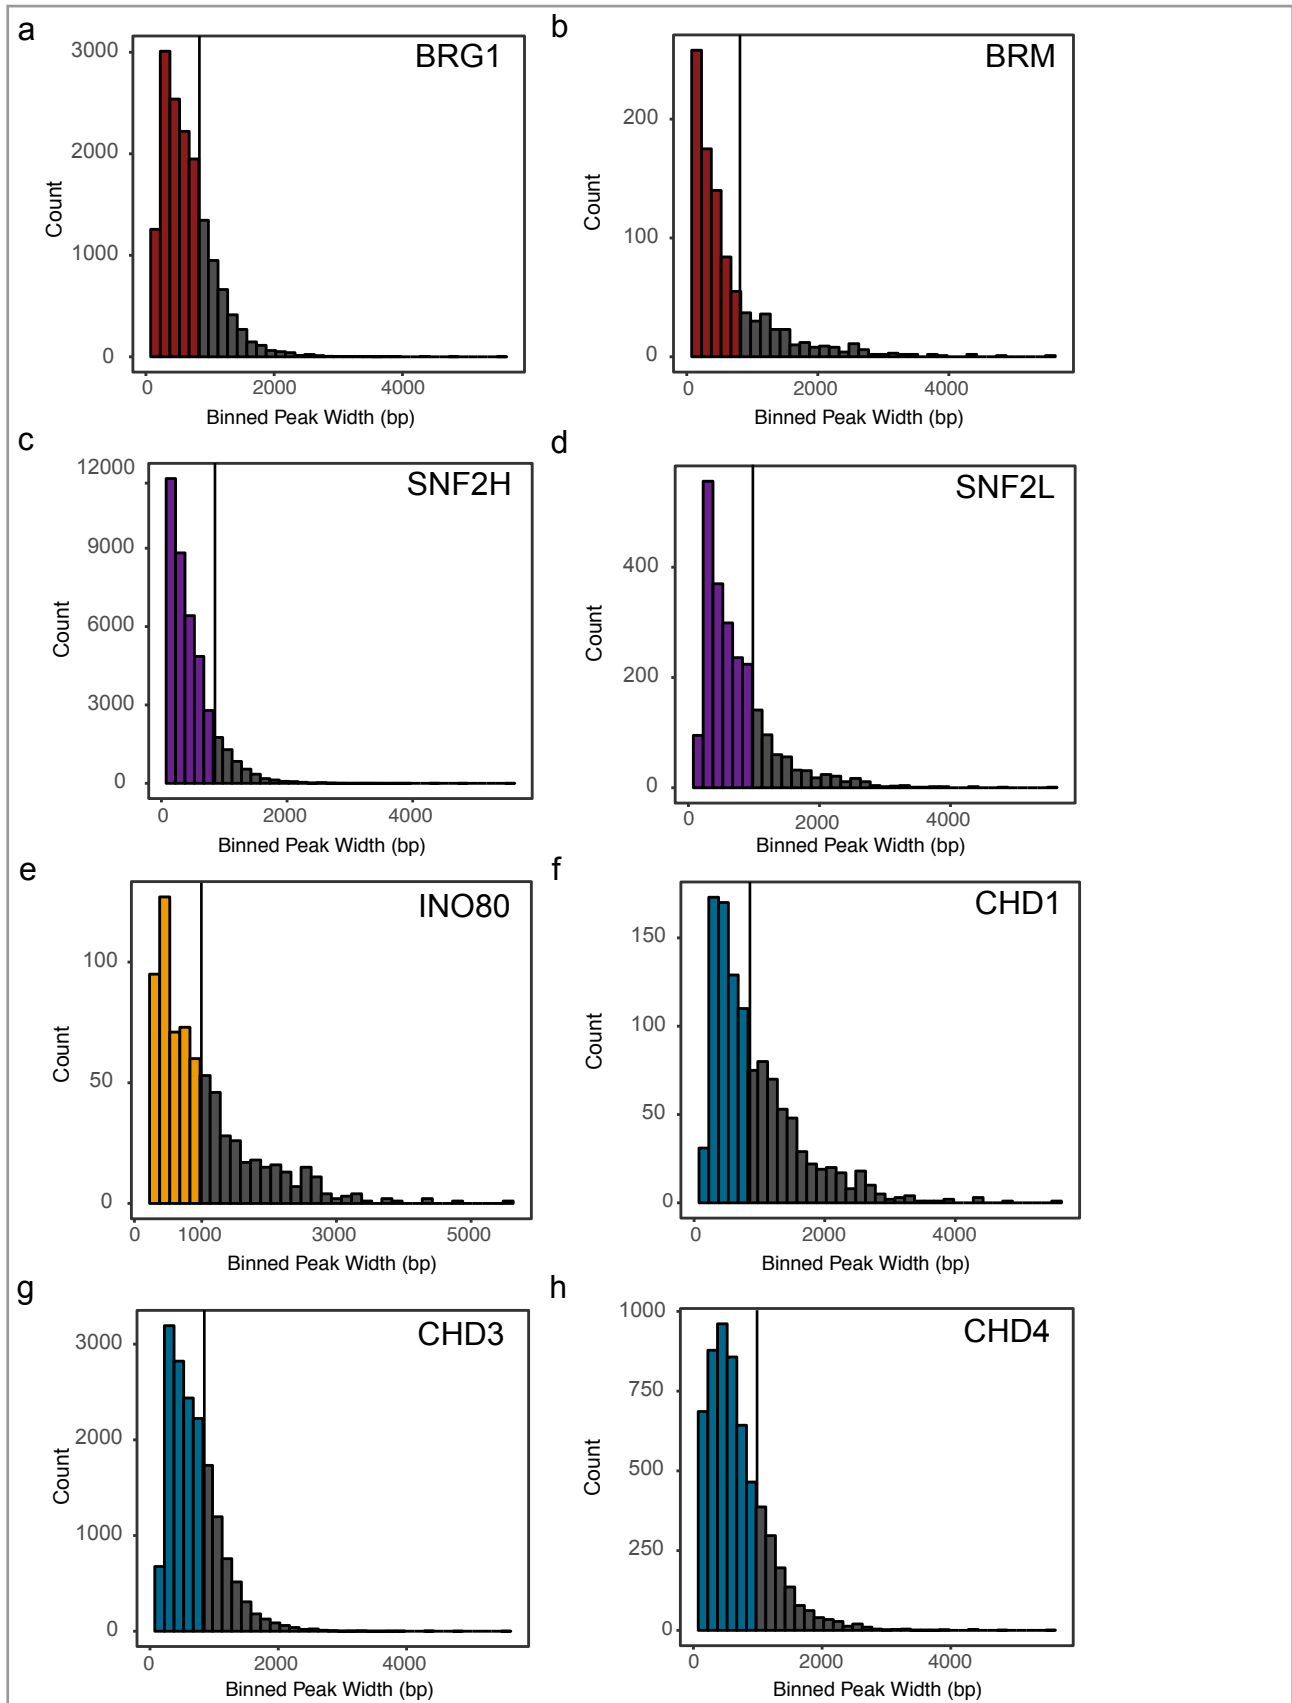

SUPPLEMENTARY FIGURE 3

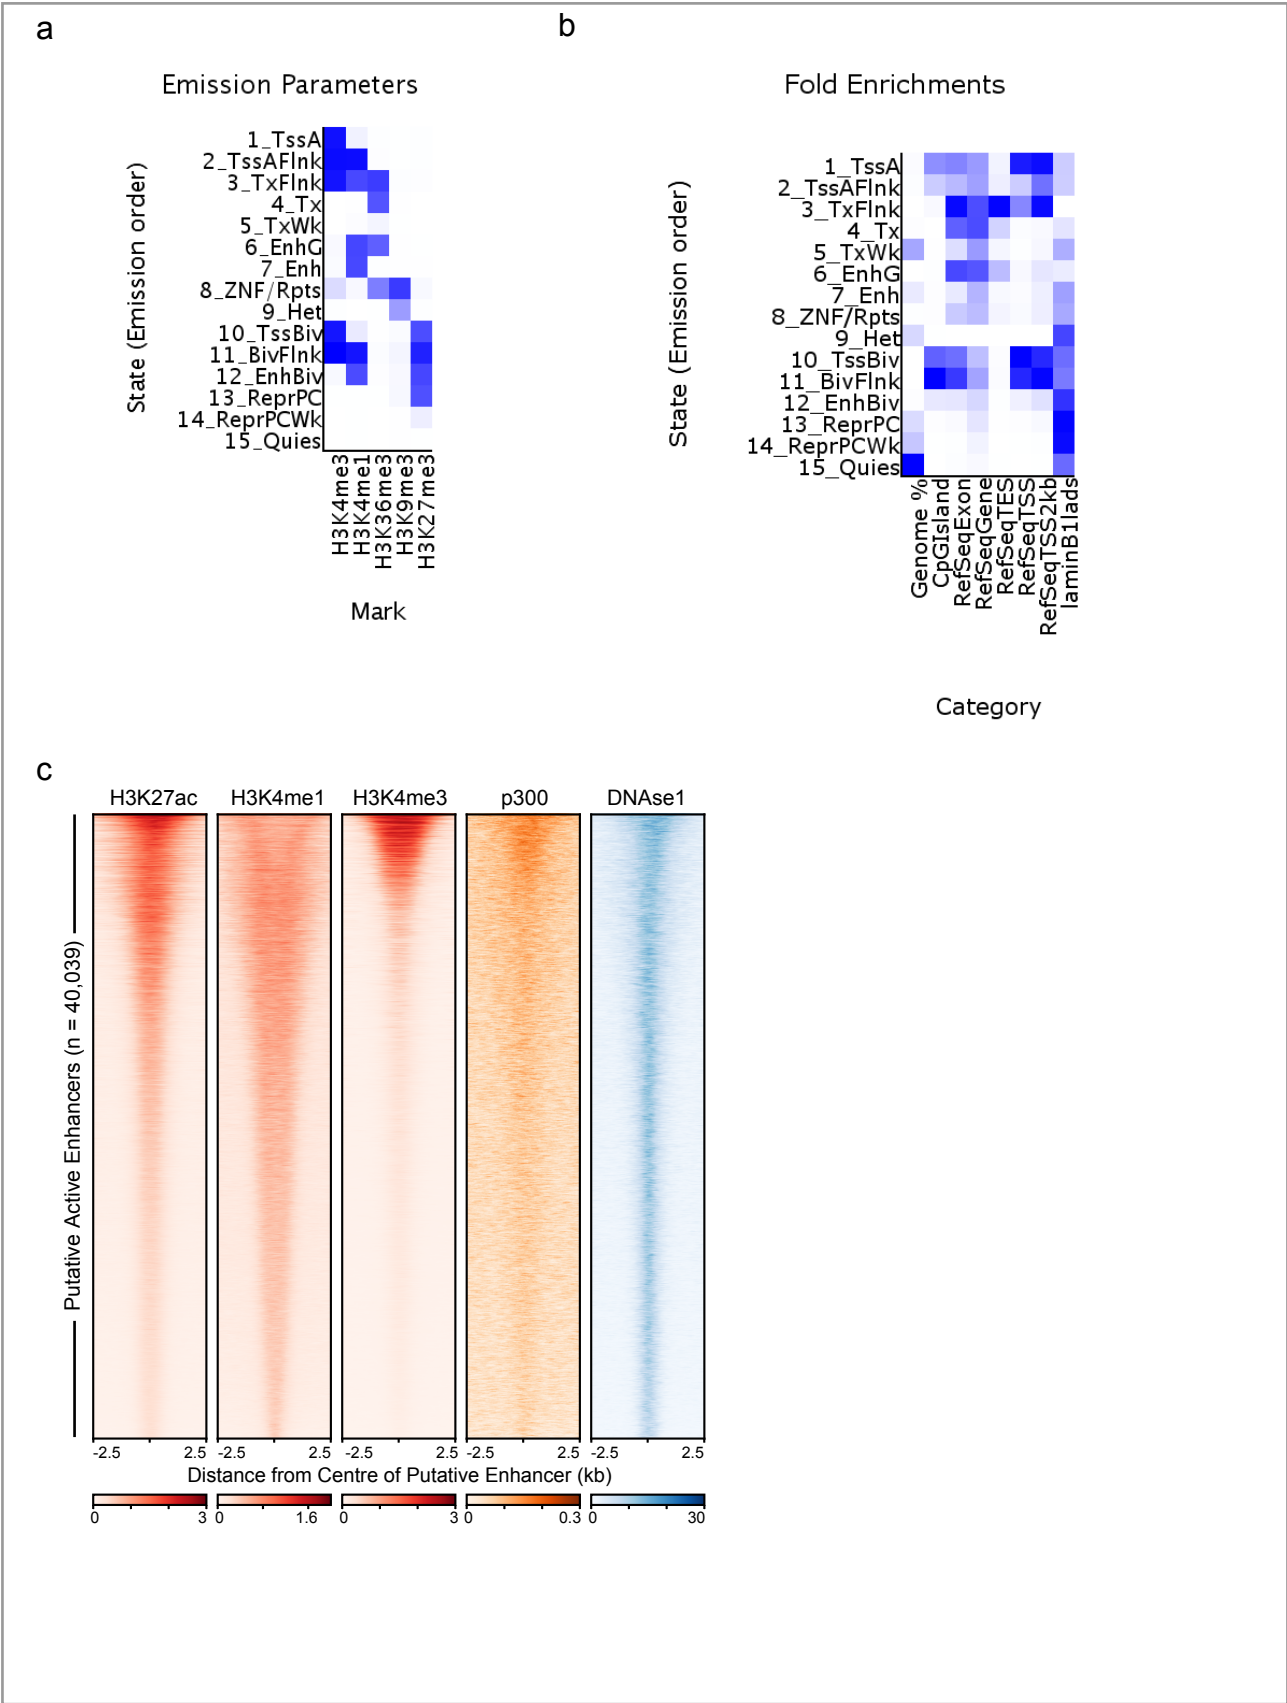

SUPPLEMENTARY FIGURE 4

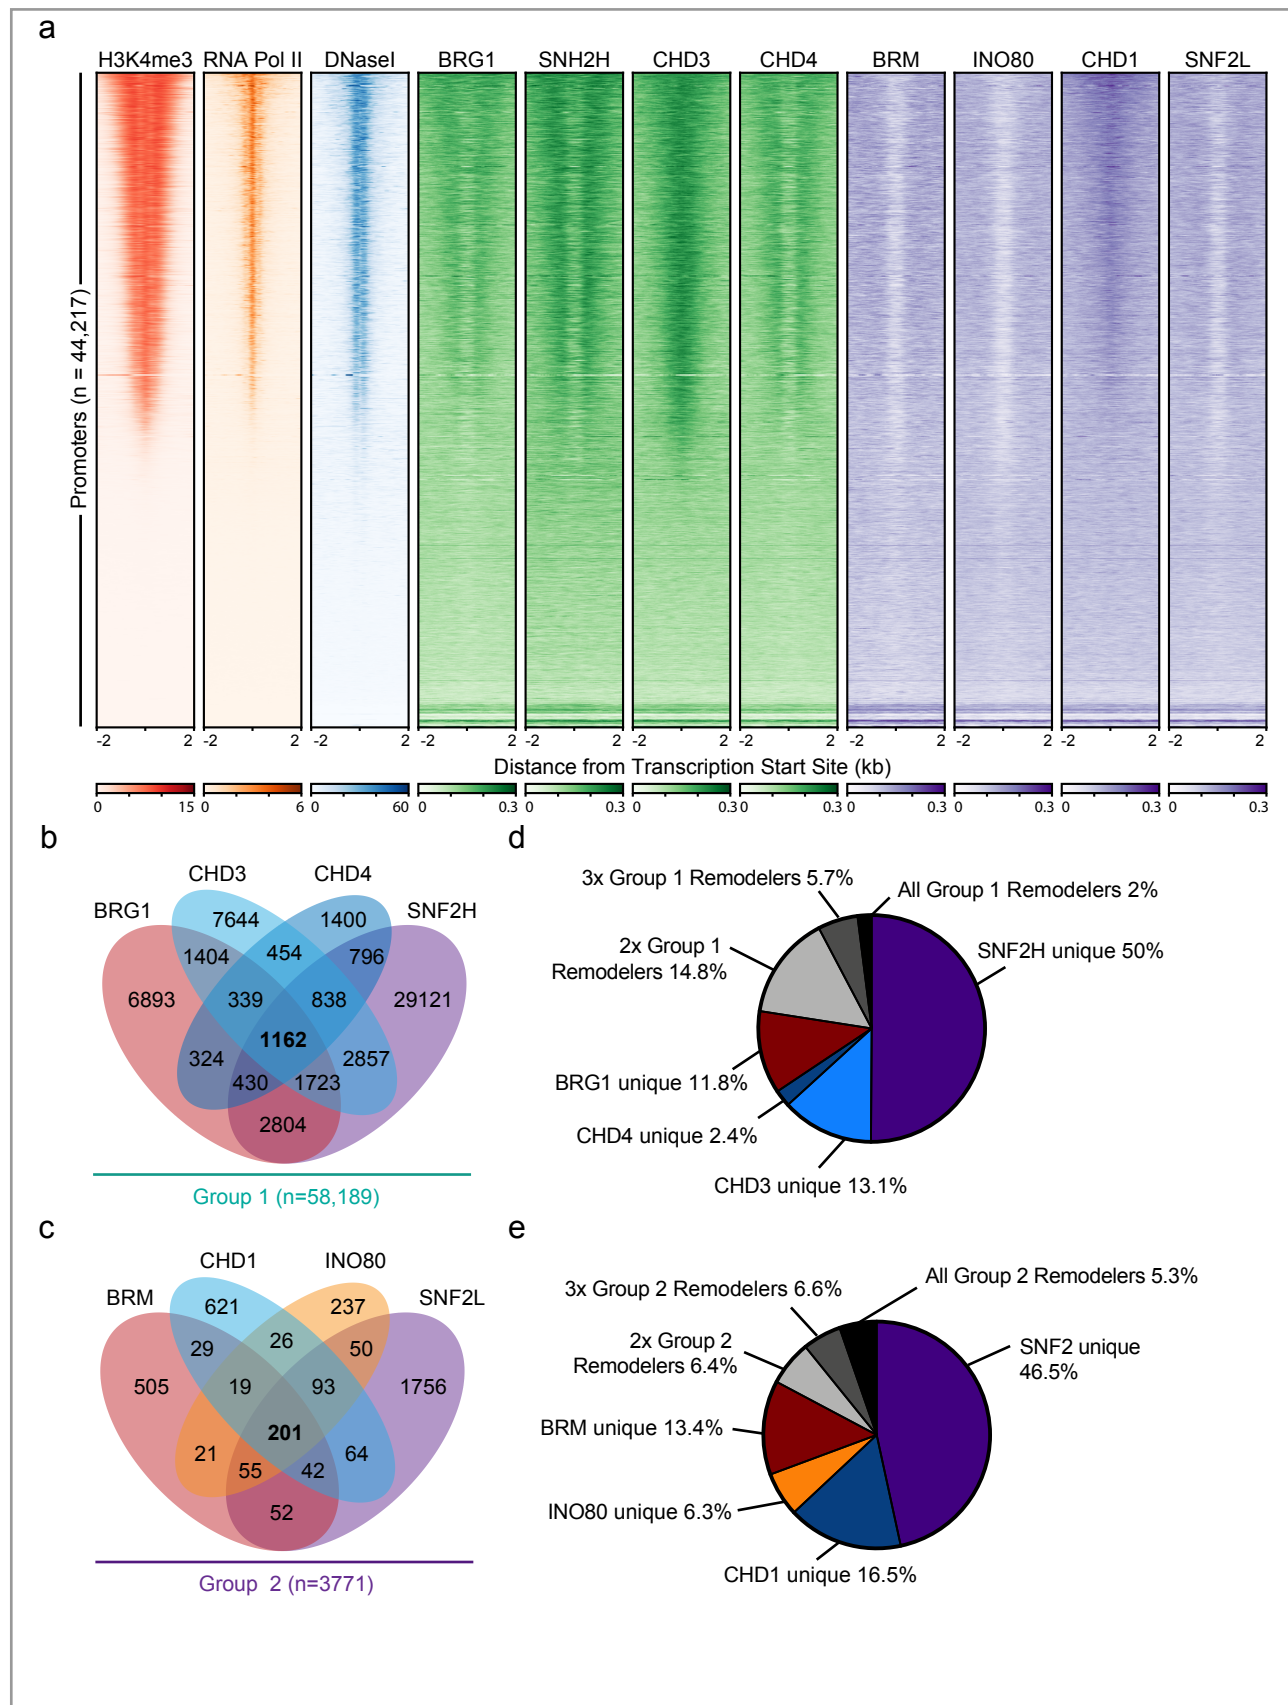

SUPPLEMENTARY FIGURE 5

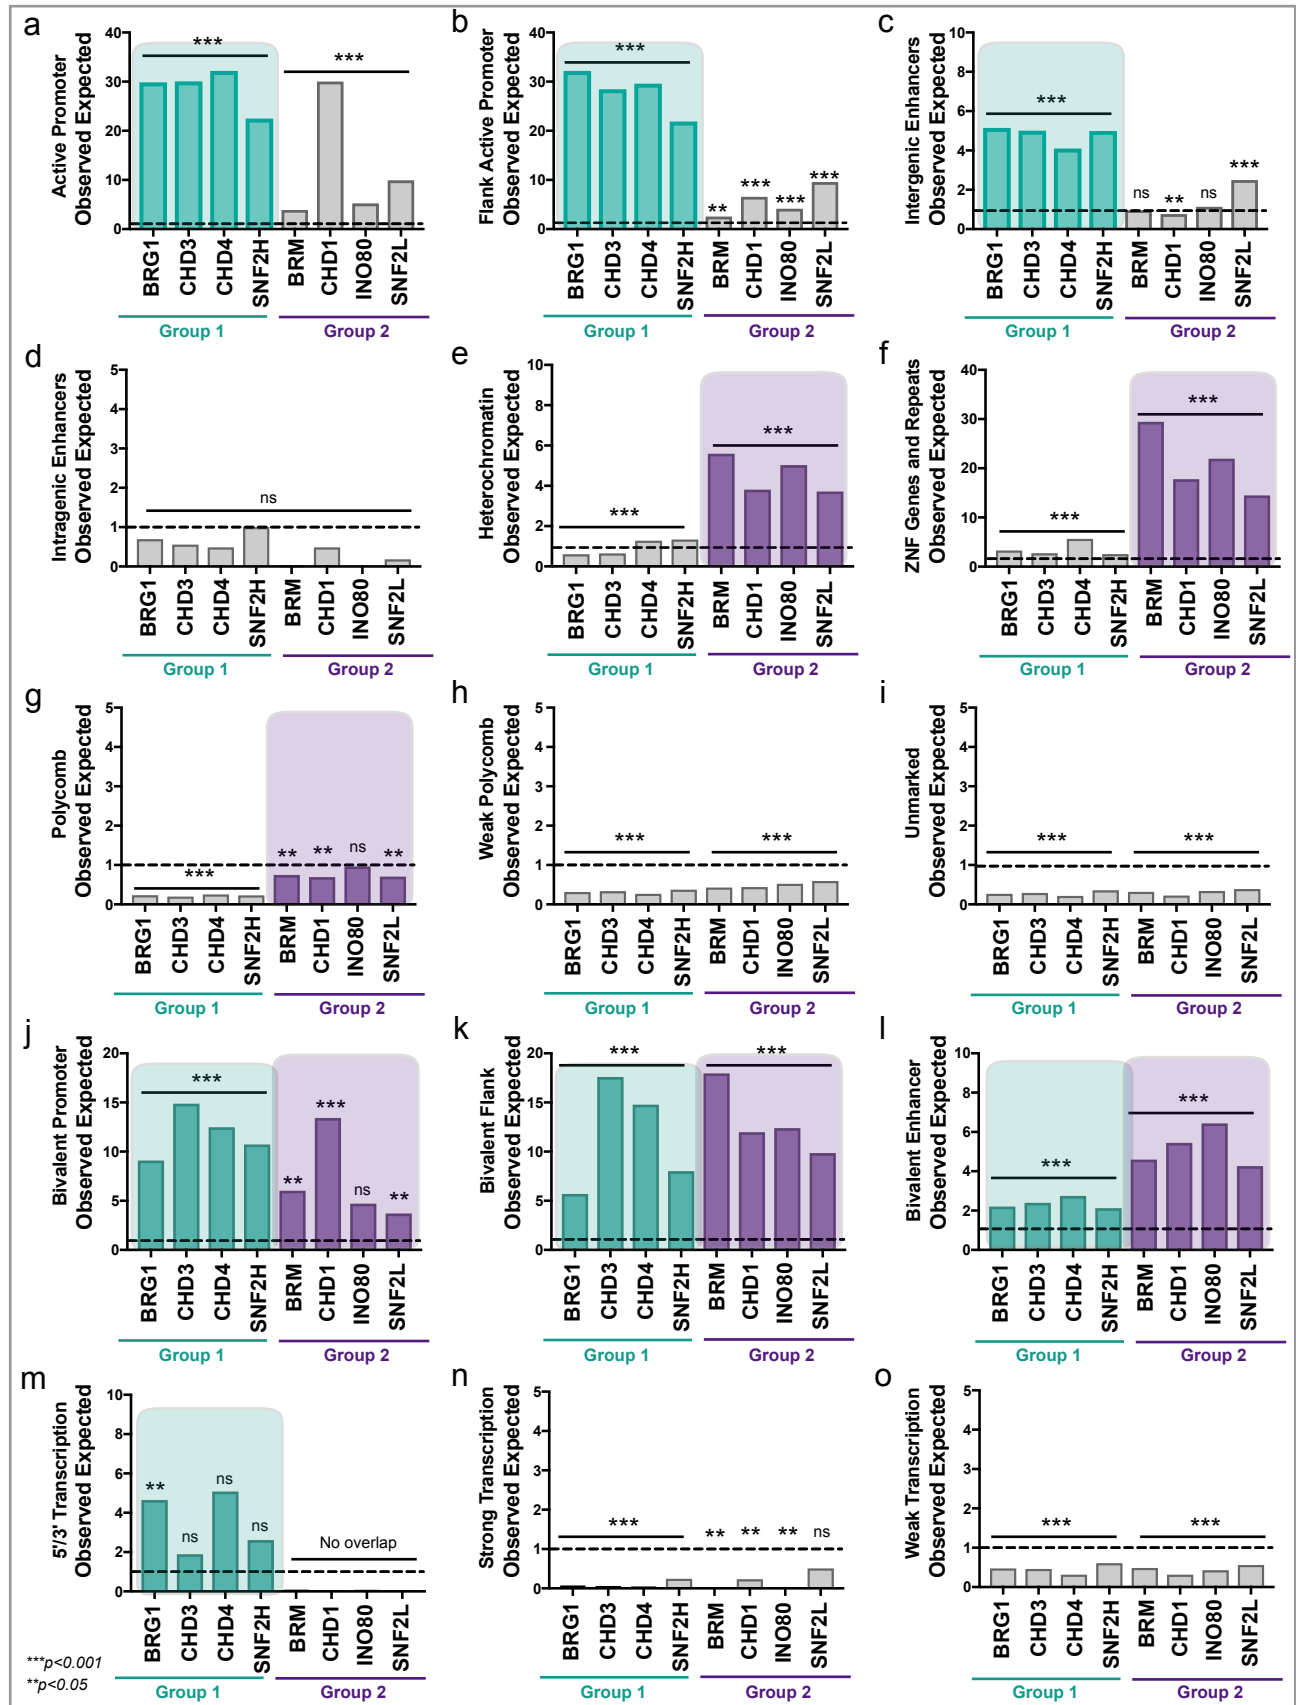

SUPPLEMENTARY FIGURE 6

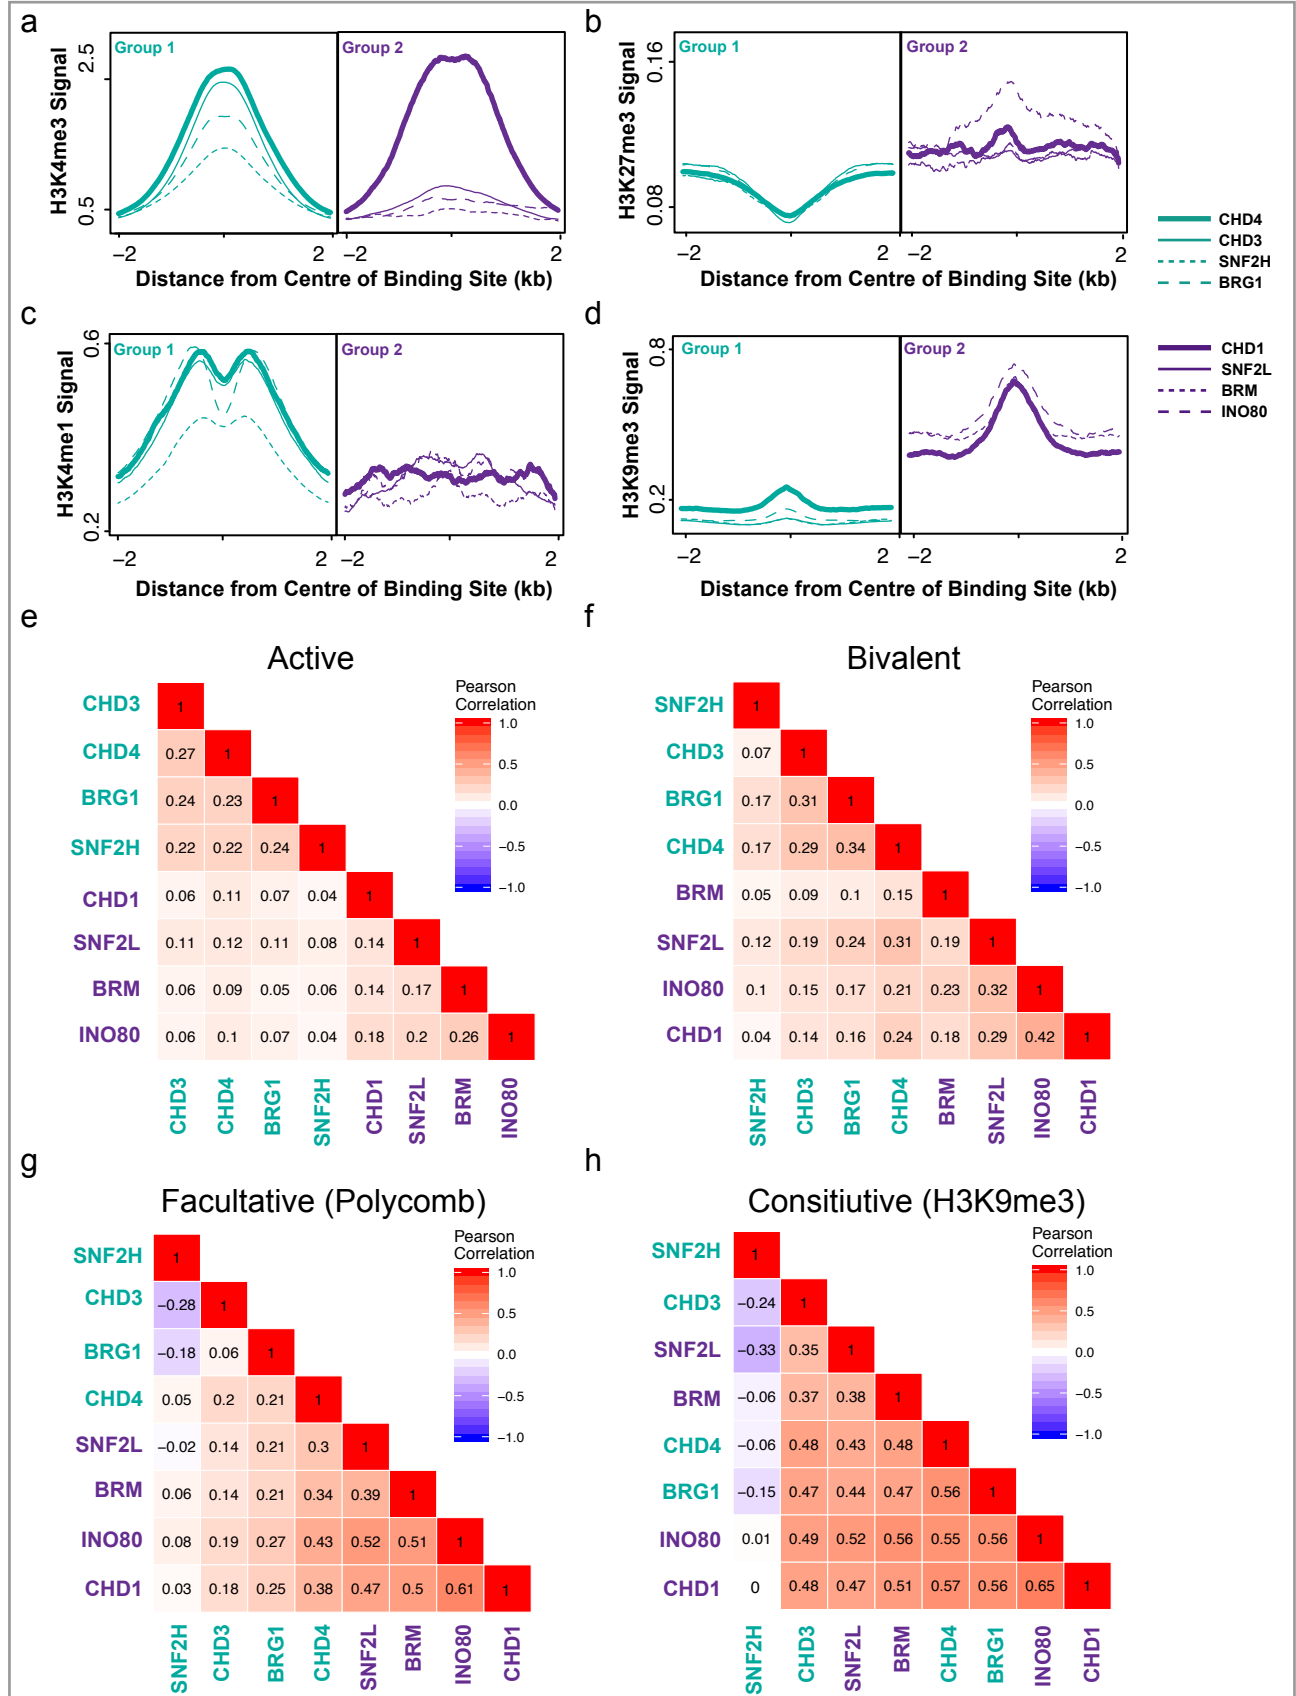

SUPPLEMENTARY FIGURE 7

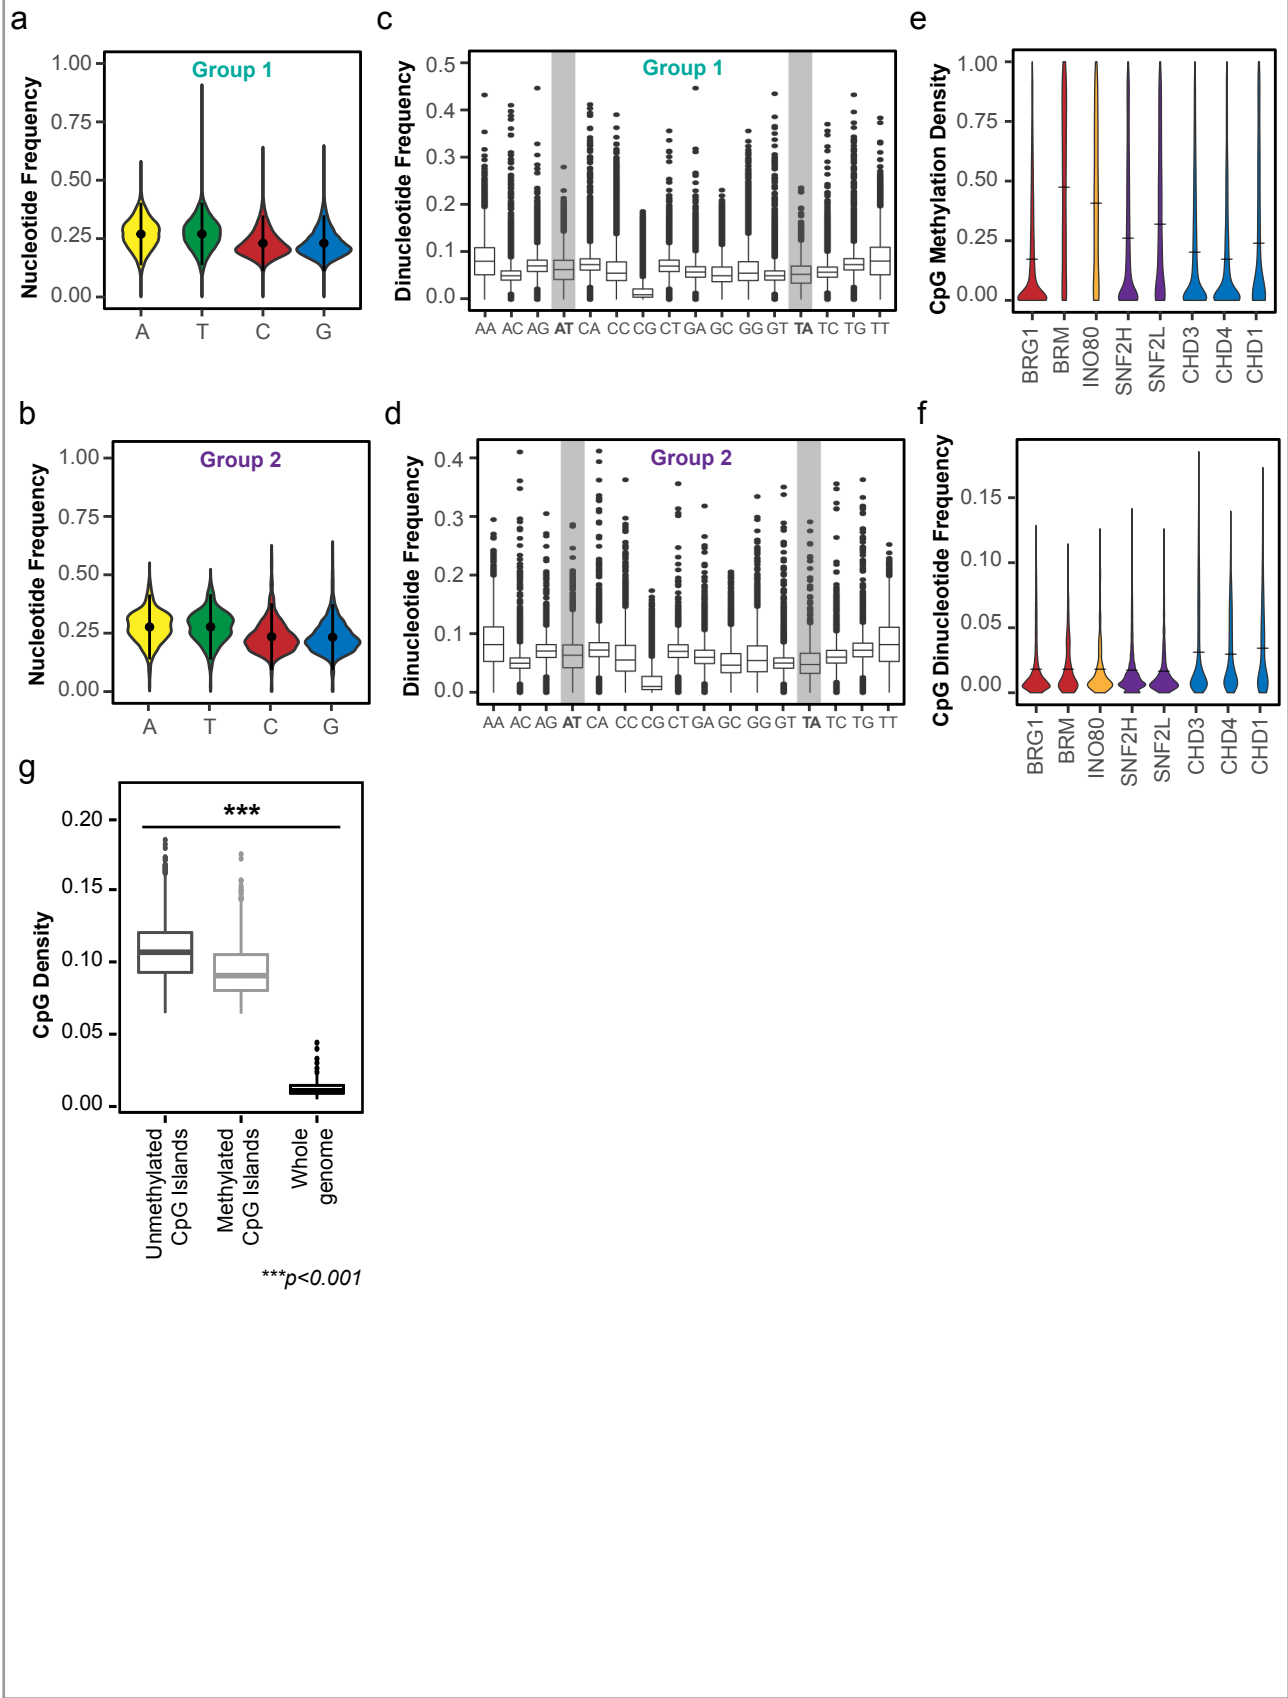

SUPPLEMENTARY FIGURE 8

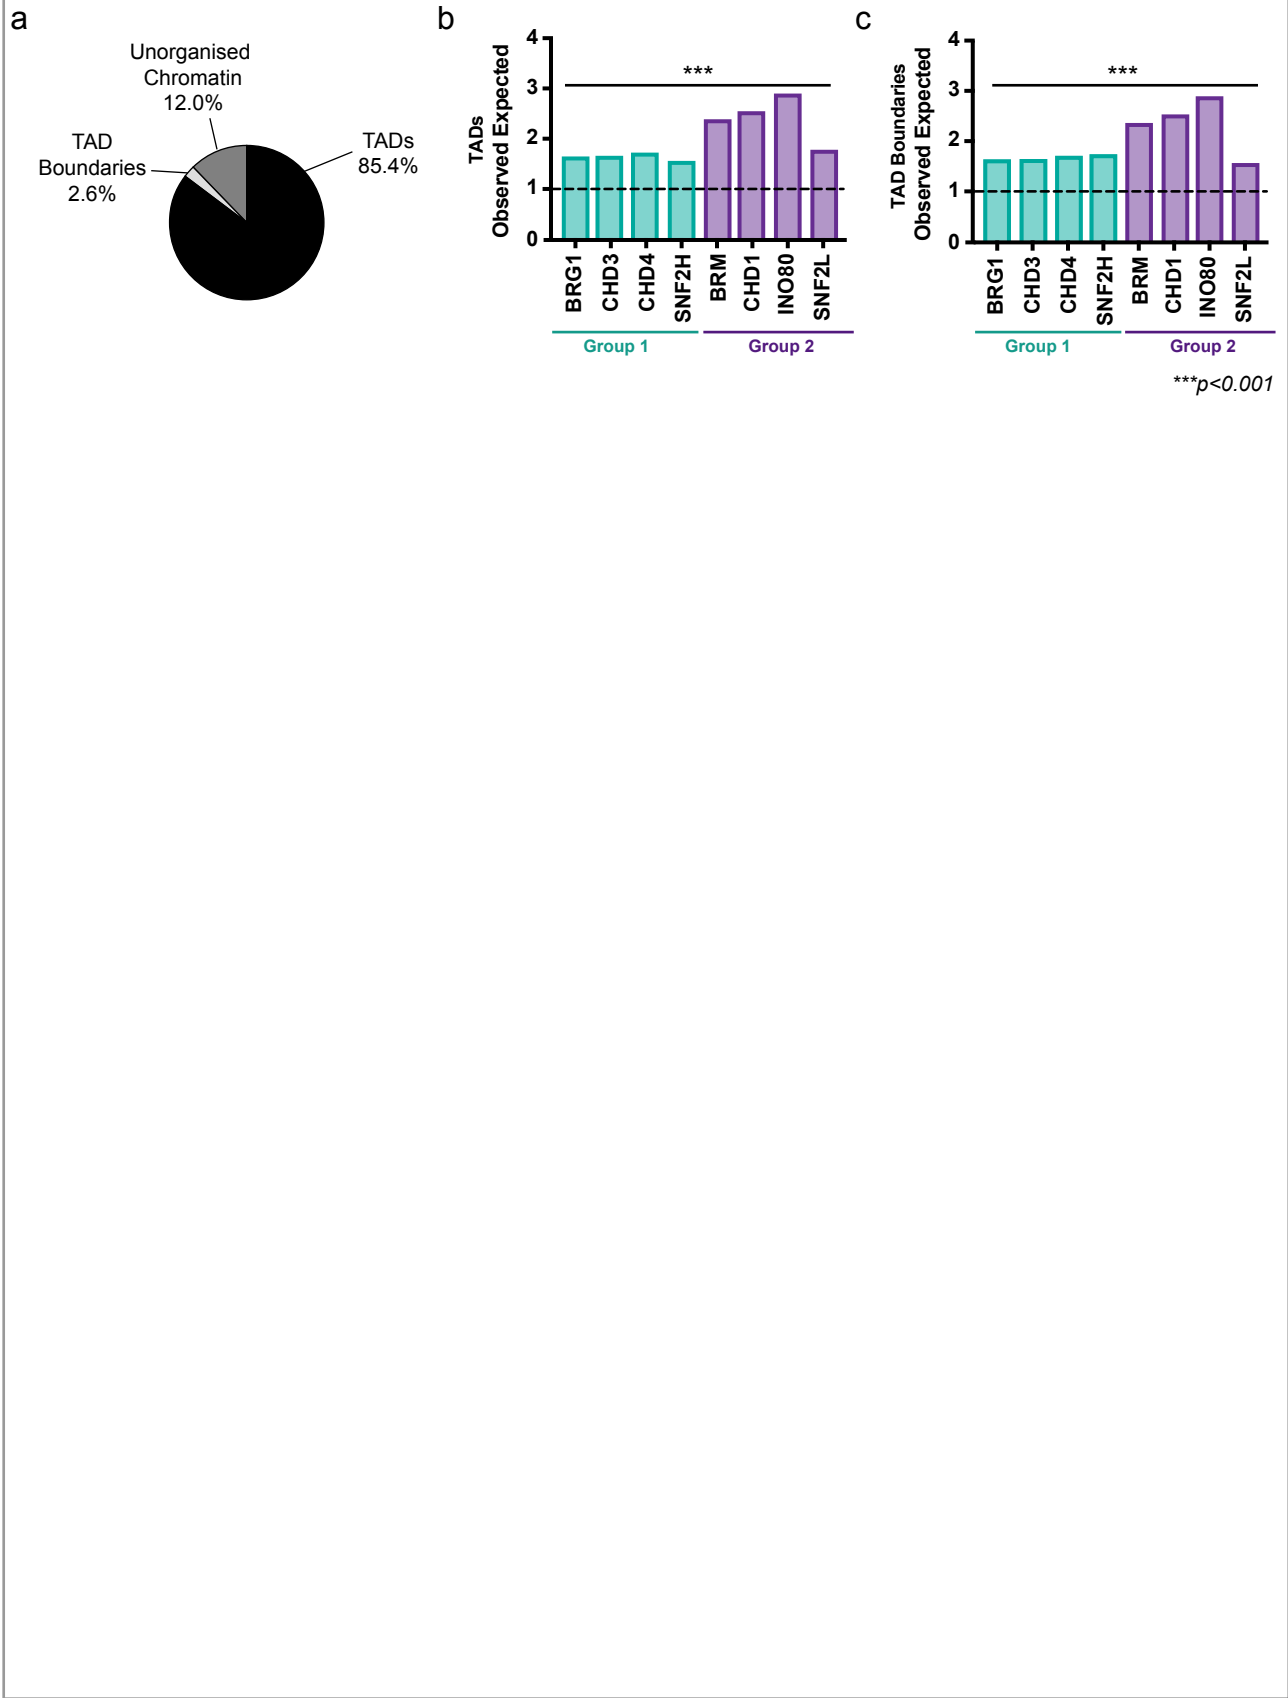

Supplement: 13072_2019_258_MOESM1_ESM.pdf [file 13072_2019_258_MOESM1_ESM.pdf]
